# Supplementary material for: Microglial control of neuronal development via somatic purinergic junctions
Source: PubMed Central journal article supplement — Cell Rep. 2022 Sep 20;40(12):111369. doi: 10.1016/j.celrep.2022.111369 (PMC9513806; doi:10.1016/j.celrep.2022.111369), 2022-09-20
Supplement: mmc1.pdf [file mmc1.pdf]

**Cell Reports, Volume 40**

**Supplemental information**

**Microglial control of neuronal development**

**via somatic purinergic junctions**

**Csaba Cserép, Anett D. Schwarcz, Balázs Pósfai, Zsófia I. László, Anna Kellermayer, Zsuzsanna Környei, Máté Kisfali, Miklós Nyerges, Zsolt Lele, István Katona,Ádám Dénes**

# Supplemental Information

## Supplemental Figures

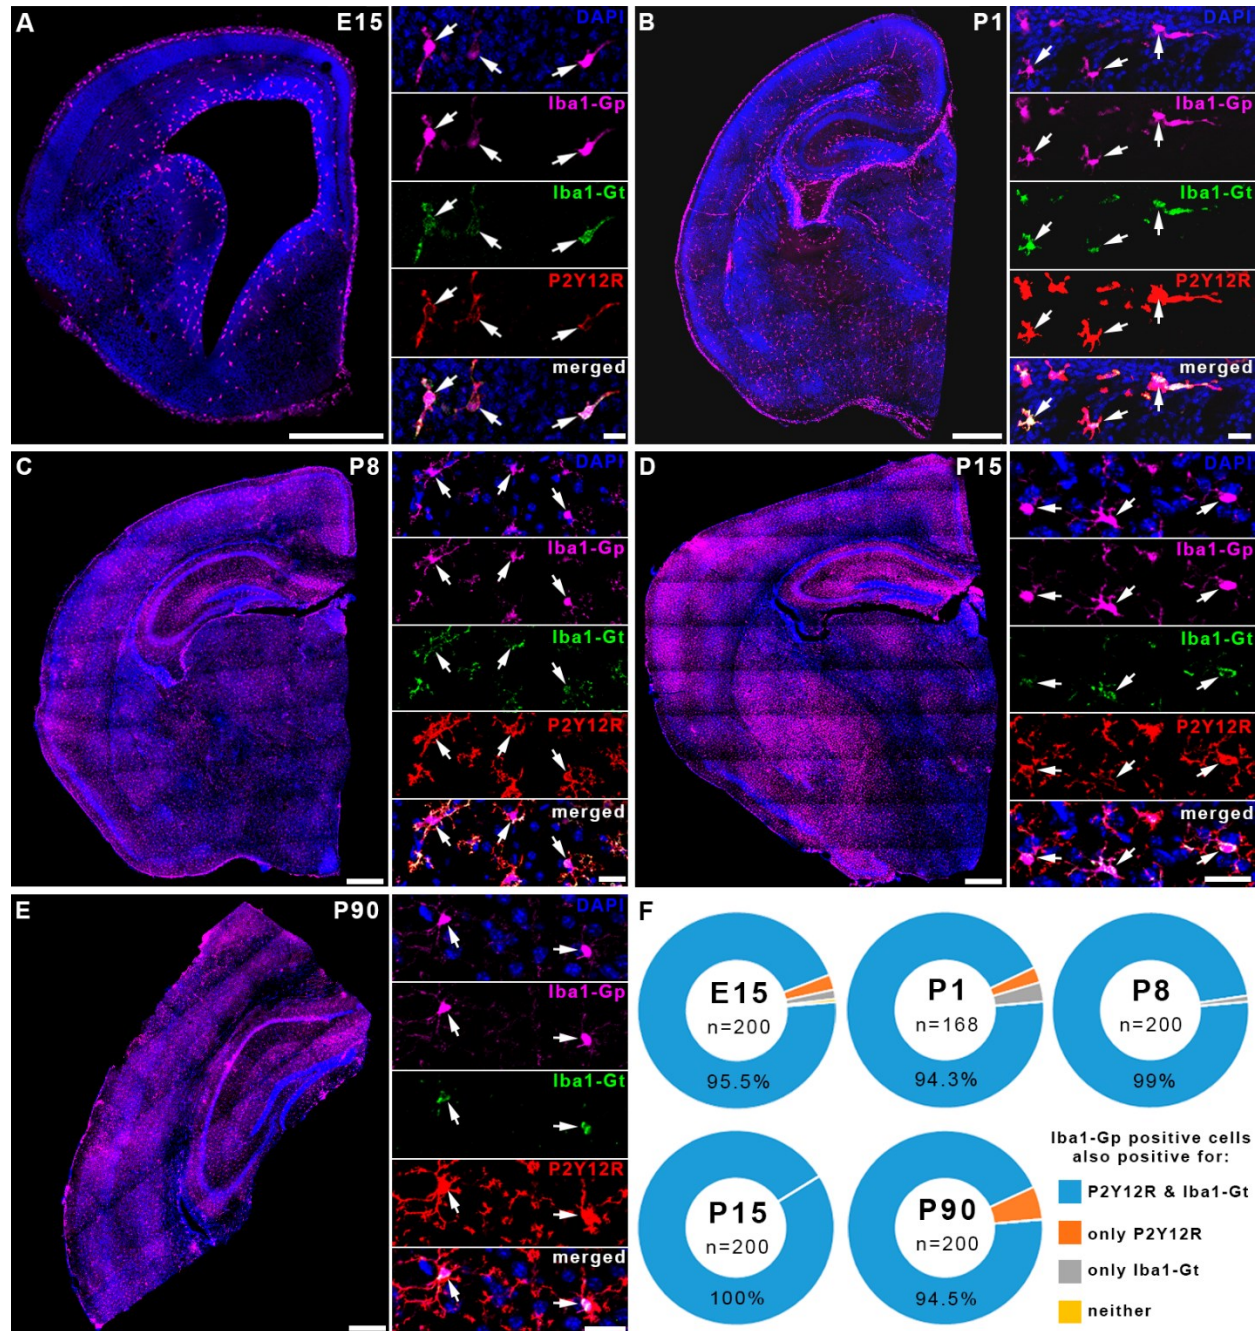

**Supplemental Figure 1. Related to Figure 1. Colocalization of microglial markers during development in the mouse brain. A-E)** Large montage images obtained with confocal laser scanning microscopy show the overall distribution pattern of IBA1-positive cells in mouse brains. Inserts show colocalization of markers (magenta: IBA1-guinea-pig ab., green: IBA1-goat ab., red: P2Y12R, blue: DAPI), white arrows point to microglial cell bodies. A – E15, B – P12, C – P8, D – P15, E – P90. **F)** The vast majority of IBA1-Gp positive cells were also positive for both IBA1-Gt and P2Y12R. Insert images and measurements are from the cortical plate in E15 mice, neocortex from P1-P15 mice and hippocampal dentate gyrus from P90 mice. Scale bars on large images: 500  $\mu$ m, on inserts 25  $\mu$ m.



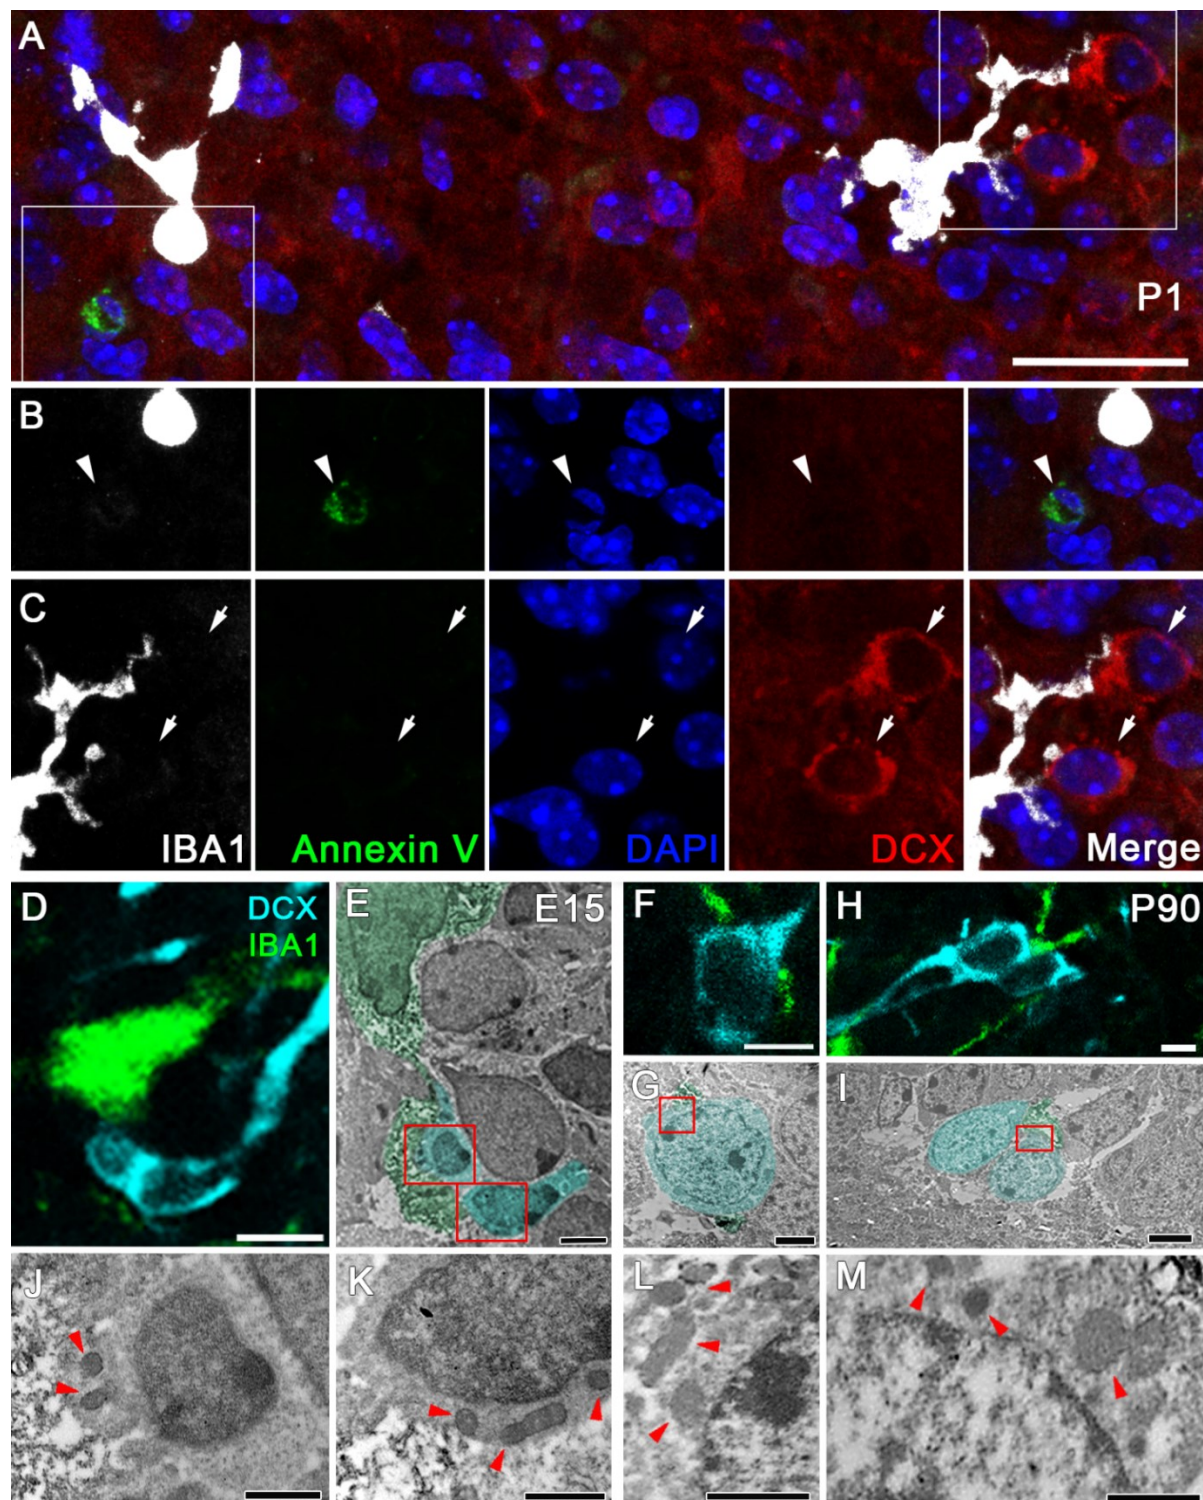

**Supplemental Figure 2. Related to Figure 2. Microglial processes form direct membrane-membrane contact with cell bodies of completely healthy DCX-positive developing neurons.** **A)** Microglia contact Annexin V-negative DCX-positive neurons (maximum intensity projection of a few image planes from a CLSM stack from a P1 mouse cortex). IBA1<sup>+</sup> microglia are shown in white, Annexin V-positive cells are shown in green, nuclei are visualized by DAPI (blue), DCX<sup>+</sup> neurons are shown in red. Area in the white box is shown on **B**, **C**. **B)** Annexin V-positive cell with partially condensed nucleus (white arrowhead). **C)** Microglia contact Annexin V-negative DCX-positive neurons, white arrow points to the nuclei of these neurons, which possess completely healthy chromatin structure. **D-M)** Maximum intensity projection of a 1.5  $\mu\text{m}$  thick volume from CLSM stacks of E15 and P90 mice shows some examples of identified microglia-neuron somatic junctions. IBA1<sup>+</sup> microglia are shown in green, DCX<sup>+</sup> neurons are shown in cyan, contacts of CLSM-identified microglia and DCX<sup>+</sup> cells (**D**, **F**, **H**) are shown on correlated TEM images (**E**, **G**, **I**), on which the healthy nucleus of DCX<sup>+</sup> cells is clearly visible. Somatic junction within the red box on (**E**, **G**, **I**), is enlarged on below (**J-M**). Red arrowheads mark healthy neuronal mitochondria close to the junction. TEM images are pseudo-colored (microglia in green, developing neurons in cyan). Scale bar is 20  $\mu\text{m}$  on **A**, 10  $\mu\text{m}$  on **D**, 2  $\mu\text{m}$  on **E**, **K**, **G**, **J**, 1  $\mu\text{m}$  on **K**, **L**, **M**, 5  $\mu\text{m}$  on **F**, **H**.

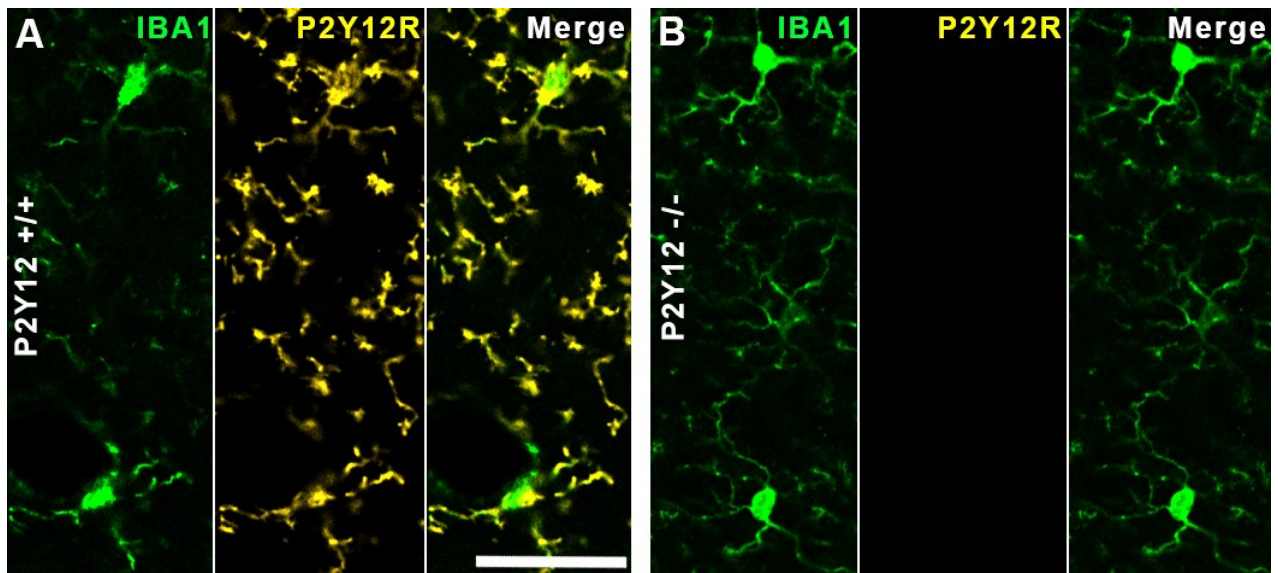

**Supplemental Figure 3. Related to Figure 3. Colocalization of microglial markers IBA1 and P2Y12R in WT and P2Y12R<sup>-/-</sup> mice. A)** Confocal laser scanning microscopy shows colocalization of IBA1 (green) and P2Y12R (yellow) in WT mouse brain. **B)** Same as on A, but on P2Y12R-KO mouse brain. P2Y12R-labeling is completely absent in the KO animals. Scale bar is 10  $\mu$ m.



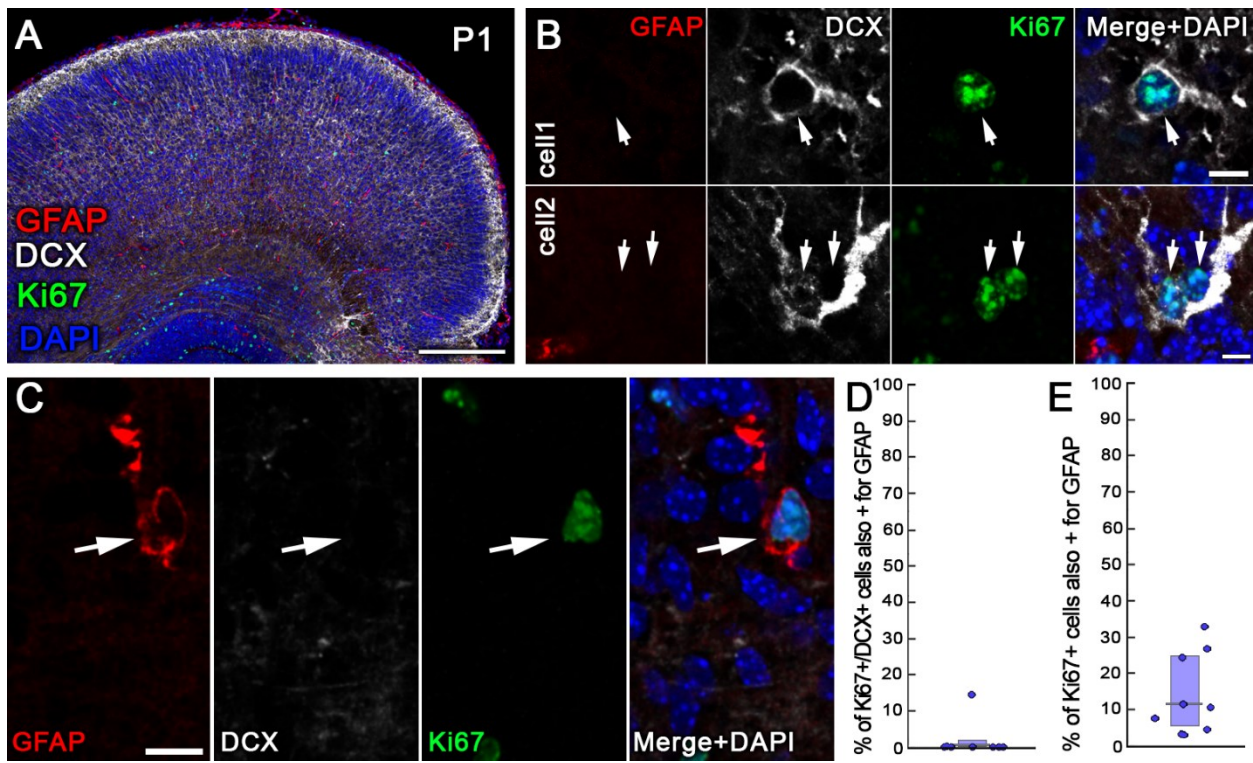

**Supplemental Figure 4. Related to Figure 6.** Ki67/DCX double positive cells are negative for GFAP, and only a minor fraction of Ki67+ cells express the astrocyte marker GFAP. **A)** Maximum intensity projection of a 20 µm thick volume from a confocal laser scanning microscopic stack from P1 mouse cortex. GFAP+ cells are red, DCX+ neurons are white, Ki67+ cells are green and nuclei are visualized by DAPI (blue). **B)** CLSM images show examples of Ki67/DCX double positive cells. GFAP is not expressed by these cells. **C)** CLSM images show an example of a GFAP/Ki67 double positive cell. **D)** Ki67/DCX-double positive cells are devoid of GFAP labeling (n=3 mice). **E)** Only a fraction of Ki67+ cells are also positive for GFAP as well (n=3 mice). Scale bars are 200 µm on A, 5 µm on B, and 20 µm on C.

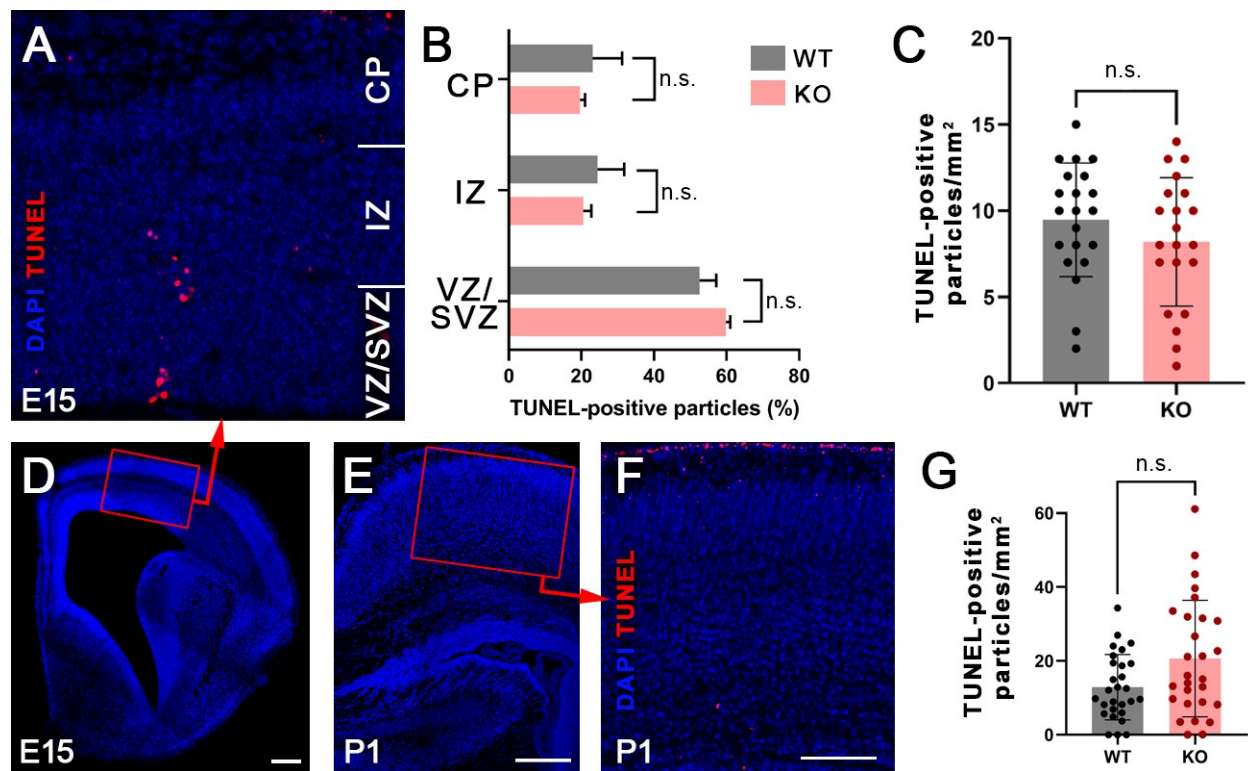

**Supplemental Figure 5. Related to Figure 6. There is no detectable difference between the density of TUNEL+ cells between WT and KO (P2Y12R<sup>-/-</sup>) mouse cortex at E15 and P1. A)** CLSM image shows DAPI-TUNEL double labeling on E15 mouse cortex. **B)** Percentage of TUNEL-positive particles throughout cortical layers in WT and KO mice at E15 (n=3-3 mice). **C)** Density of TUNEL-positive particles does not differ in WT and KO mice (3-3 mice). Unpaired t-test; n.s. no significant difference. **D)** CLSM image shows DAPI-labeled E15 mouse brain hemisphere, red box marks area of measurement. **E)** CLSM image shows DAPI-labeled P1 mouse brain cortical region, red box marks area of measurement. **F)** CLSM image shows DAPI-TUNEL double labeling on P1 mouse cortex. **G)** Density of TUNEL-positive particles does not differ in WT and KO mouse cortex at P1 (3-3 mice). Unpaired t-test; n.s. no significant difference. Scale bars are 200  $\mu\text{m}$  on D, E, 100  $\mu\text{m}$  on F (also for A).

## Supplemental Tables

**Supplemental Table 1. Microglial contact prevalence on DCX+ cells.** Related to Figure 1. I-P.

| Microglial contact prevalence on DCX+ cells |                  |        |           |        |           |
|---------------------------------------------|------------------|--------|-----------|--------|-----------|
|                                             | $\Sigma$ contact | soma   | prox.tuft | both   | n (cells) |
| <b>E15</b>                                  | 35.20%           | 27.50% | 5.60%     | 2.10%  | 142       |
| <b>P1</b>                                   | 36.40%           | 25.80% | 6.10%     | 4.50%  | 132       |
| <b>P8</b>                                   | 61.90%           | 44.70% | 9.50%     | 7.70%  | 168       |
| <b>P15</b>                                  | 97.20%           | 62.30% | 6.60%     | 28.30% | 106       |
| <b>P90</b>                                  | 92.50%           | 35.80% | 14.20%    | 42.50% | 106       |

**Supplemental Table 2. Mitochondrial enrichment at contact sites.** Related to Figure 2. O-S.

| TOM20 fluorescent intensity comparison |                                     |                                 |            |         |              |
|----------------------------------------|-------------------------------------|---------------------------------|------------|---------|--------------|
|                                        | non-contact (median, interquartile) | contact (median, interquartile) | difference | p value | n (contacts) |
| <b>E15</b>                             | <b>0.32</b> , 0.22-0.42             | <b>0.13</b> , 0.09-0.15         | 146.00%    | p<0.001 | 30           |
| <b>P1</b>                              | <b>0.3</b> , 0.23-0.43              | <b>0.09</b> , 0.05-0.13         | 233.00%    | p<0.001 | 30           |
| <b>P8</b>                              | <b>0.3</b> , 0.19-0.42              | <b>0.09</b> , 0.06-0.13         | 233.00%    | p<0.001 | 33           |
| <b>P15</b>                             | <b>0.3</b> , 0.21-0.36              | <b>0.08</b> , 0.05-0.12         | 275.00%    | p<0.001 | 30           |
| <b>P90</b>                             | <b>0.22</b> , 0.15-0.31             | <b>0.1</b> , 0.06-0.15          | 120.00%    | p<0.001 | 41           |

**Supplemental Table 3. P2Y12R enrichment at contact sites.** Related to Figure 3. G.

| Percentage of P2Y12R labeling |         |        |              |              |
|-------------------------------|---------|--------|--------------|--------------|
| Age                           | quarter | median | 1st quartile | 3rd quartile |
| E15                           | 1st     | 53%    | 39%          | 81%          |
|                               | 2nd     | 29%    | 8%           | 44%          |
|                               | 3rd     | 15%    | 3%           | 22%          |
|                               | 4th     | 0%     | 0%           | 6%           |
| P1                            | 1st     | 44%    | 34%          | 50%          |
|                               | 2nd     | 24%    | 14%          | 39%          |
|                               | 3rd     | 9%     | 4%           | 21%          |
|                               | 4th     | 8%     | 0%           | 22%          |
| P8                            | 1st     | 38%    | 36%          | 100%         |
|                               | 2nd     | 26%    | 0%           | 42%          |
|                               | 3rd     | 16%    | 0%           | 19%          |
|                               | 4th     | 0%     | 0%           | 2%           |
| P15                           | 1st     | 53%    | 47%          | 72%          |
|                               | 2nd     | 30%    | 27%          | 36%          |
|                               | 3rd     | 8%     | 0%           | 21%          |
|                               | 4th     | 0%     | 0%           | 2%           |
| P90                           | 1st     | 46%    | 37%          | 51%          |
|                               | 2nd     | 32%    | 28%          | 38%          |
|                               | 3rd     | 18%    | 10%          | 27%          |
|                               | 4th     | 1%     | 0%           | 10%          |
